# Supplementary material
Source: Springer Nature journal article supplement (https://www.springermedizin.de/resource/supplementary/12879_2013_4196_MOESM1_ESM.pdf/9445116)

a) Any NADC

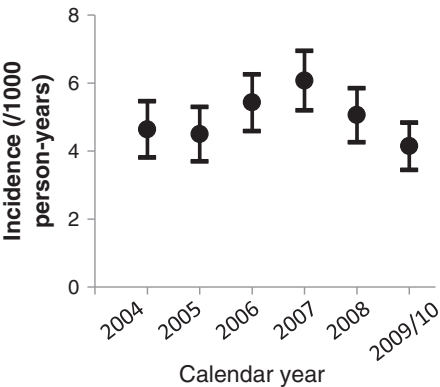

b) Lung cancer

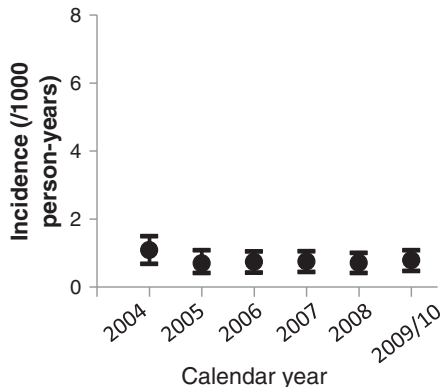

c) Anal cancer

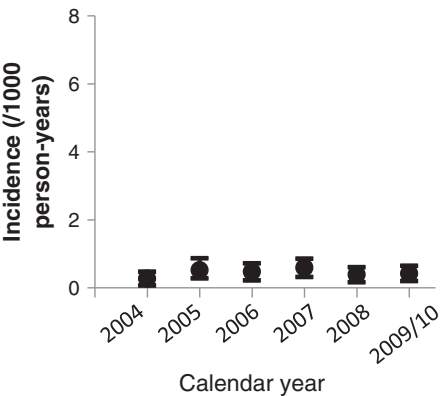

d) Hodgkin's lymphoma

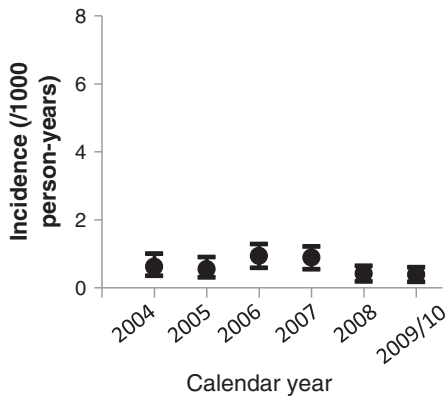

Supplement: MOESM1 [file 9445116]
